# Supplementary material for: Correlates of Breakthrough SARS-CoV-2 Infections in People with HIV: Results from the CIHR CTN 328 Study
Source: MDPI journal article supplement (doi:10.3390/vaccines12050447), 2024-04-23
Supplement: s1 [file s1]

## Supplementary Tables

**Table S1: Participant characteristics stratified based on COVID-19 BTI**

|                                         | Participants without<br>COVID-19 BTI (n=197) | Participants with<br>COVID-19 BTI (n=92) |       |
|-----------------------------------------|----------------------------------------------|------------------------------------------|-------|
| Variable                                |                                              |                                          | P     |
| <b>Medical Conditions</b>               |                                              |                                          |       |
| Cardiovascular disease                  | 10 (5.2)                                     | 4 (4.3)                                  | 0.761 |
| Chronic kidney disease                  | 9 (4.7)                                      | 2 (2.2)                                  | 0.308 |
| Hypertension                            | 31 (16.1)                                    | 8 (8.7)                                  | 0.091 |
| Diabetes                                | 20 (10.4)                                    | 4 (4.3)                                  | 0.087 |
| Dyslipidemia                            | 30 (15.5)                                    | 11 (12.0)                                | 0.420 |
| Chronic lung disease                    | 19 (9.8)                                     | 6 (6.5)                                  | 0.354 |
| Chronic liver disease                   | 9 (4.7)                                      | 6 (6.5)                                  | 0.511 |
| Blood disorder                          | 3 (1.6)                                      | 3 (3.3)                                  | 0.392 |
| Endocrine disorder                      | 9 (4.7)                                      | 6 (6.5)                                  | 0.511 |
| Malignancy                              | 7 (3.6)                                      | 2 (2.2)                                  | 0.512 |
| Metabolic disturbance                   | 5 (2.6)                                      | 4 (4.3)                                  | 0.428 |
| Rheumatological condition               | 8 (4.1)                                      | 3 (3.3)                                  | 0.717 |
| Vascular disease                        | 2 (1.0)                                      | 0 (0.0)                                  | 1.000 |
| Obesity                                 | 38/186 (20.4)                                | 18/87 (20.7)                             | 0.961 |
| <b>Body mass index</b>                  |                                              |                                          | 0.961 |
| Median (IQR)                            | 26.1 (23.3, 29.2)                            | 26.2 (23.2, 29.1)                        |       |
| Range                                   | (16.1, 58.7)                                 | (15.5, 44.8)                             |       |
| Number missing                          | 11                                           | 5                                        |       |
| <b>Tobacco smoker</b>                   | 47 (24.4)                                    | 16 (17.4)                                | 0.185 |
| <b>Use e-cigarettes</b>                 | 10 (5.2)                                     | 0 (0.0)                                  | 0.027 |
| <b>Mode of HIV acquisition</b>          |                                              |                                          |       |
| Sex with a man                          | 127 (64.5)                                   | 65 (70.7)                                | 0.300 |
| Sex with a woman                        | 18 (9.1)                                     | 6 (6.5)                                  | 0.453 |
| Injection drug use                      | 12 (6.1)                                     | 8 (8.7)                                  | 0.416 |
| Blood product                           | 2 (1.0)                                      | 3 (3.3)                                  | 0.331 |
| Occupational exposure                   | 0 (0.0)                                      | 0 (0.0)                                  | -     |
| Perinatal transmission                  | 3 (1.5)                                      | 1 (1.1)                                  | 1.000 |
| Other                                   | 8 (4.1)                                      | 1 (1.1)                                  | 0.175 |
| Unknown                                 | 41 (20.8)                                    | 14 (15.2)                                | 0.259 |
| <b>Risk factors for HIV acquisition</b> |                                              |                                          |       |
| Injection drug use                      | 17 (8.6)                                     | 8 (8.7)                                  | 0.985 |
| Blood product recipient                 | 4 (2.0)                                      | 3 (3.3)                                  | 0.683 |

|                                                                                                               |            |           |       |
|---------------------------------------------------------------------------------------------------------------|------------|-----------|-------|
| MSM                                                                                                           | 105 (53.3) | 51 (55.4) | 0.734 |
| Bisexual                                                                                                      | 8 (4.1)    | 4 (4.3)   | 0.909 |
| Originating from an endemic country                                                                           | 25 (12.7)  | 10 (10.9) | 0.659 |
| Sex work                                                                                                      | 2 (1.0)    | 1 (1.1)   | 1.000 |
| Hemophilia                                                                                                    | 0 (0.0)    | 1 (1.1)   | 0.318 |
| Other                                                                                                         | 18 (9.1)   | 3 (3.3)   | 0.073 |
| Unknown                                                                                                       | 39 (19.8)  | 23 (25.0) | 0.315 |
| <b>AIDS Defining Illness, n (%)</b>                                                                           |            |           |       |
| None                                                                                                          | 157 (79.7) | 77 (83.7) | 0.420 |
| Candidiasis, esophageal                                                                                       | 3 (1.5)    | 2 (2.2)   | 0.655 |
| Cryptococcosis, extrapulmonary                                                                                | 0 (0.0)    | 1 (1.1)   | 0.318 |
| Cytomegalovirus disease (other than liver, spleen, or nodes)                                                  | 1 (0.5)    | 1 (1.1)   | 0.536 |
| Cytomegalovirus retinitis (with loss of vision)                                                               | 2 (1.0)    | 0 (0.0)   | 1.000 |
| Encephalopathy, HIV-related                                                                                   | 3 (1.5)    | 1 (1.1)   | 1.000 |
| Herpes simplex: chronic ulcer(s) (greater than 1 month's duration); or bronchitis, pneumonitis or esophagitis | 1 (0.5)    | 1 (1.1)   | 0.536 |
| Histoplasmosis, disseminated or extrapulmonary                                                                | 1 (0.5)    | 0 (0.0)   | 1.000 |
| Kaposi's sarcoma                                                                                              | 8 (4.1)    | 2 (2.2)   | 0.414 |
| Lymphoma, Burkitt's (or equivalent term)                                                                      | 3 (1.5)    | 3 (3.3)   | 0.387 |
| Mycobacterium avium complex M. kansasii, disseminated or extrapulmonary                                       | 1 (0.5)    | 1 (1.1)   | 0.536 |
| Mycobacterium tuberculosis, any site (pulmonary or extrapulmonary)                                            | 2 (1.0)    | 1 (1.1)   | 1.000 |
| Pneumocystis carinii pneumonia                                                                                | 14 (7.1)   | 2 (2.2)   | 0.088 |
| Pneumonia, recurrent                                                                                          | 5 (2.5)    | 0 (0.0)   | 0.182 |
| Toxoplasmosis of brain                                                                                        | 2 (1.0)    | 0 (0.0)   | 1.000 |
| Wasting syndrome due to HIV                                                                                   | 3 (1.5)    | 2 (2.2)   | 0.655 |
| Other                                                                                                         | 7 (3.6)    | 4 (4.3)   | 0.742 |

|                                                                       |               |              |       |
|-----------------------------------------------------------------------|---------------|--------------|-------|
| <b>Hospitalized in the 12 months preceding study enrolment, n (%)</b> | 16/194 (8.2)  | 6/92 (6.5)   | 0.609 |
| <b>Cannabis usage in the past 12 months, n (%)</b>                    | 60/193 (31.1) | 42/92 (45.7) | 0.016 |
| <b>Highest level of education completed, n (%)</b>                    |               |              | 0.508 |
| Prefer not to answer/No response                                      | 10            | 2            |       |
| Less than high school graduation                                      | 15 (8.0)      | 5 (5.6)      |       |
| High school graduation                                                | 47 (25.1)     | 17 (18.9)    |       |
| Trade certificate, vocational school, or apprenticeship training      | 20 (10.7)     | 9 (10.0)     |       |
| Non-university certificate or diploma from a community college, CEGEP | 40 (21.4)     | 17 (18.9)    |       |
| University Bachelor's degree                                          | 40 (21.4)     | 28 (31.1)    |       |
| University graduate degree (Master's, Doctorate, etc.)                | 25 (13.4)     | 14 (15.6)    |       |

**Table S2: Symptoms reported by participants with BTI. Note that data was only available for 69/92 participants with BTI.**

| <b>Signs, n (%)</b>          | <b>All BTI (n=69)</b> |
|------------------------------|-----------------------|
| Fever, chills                | 32 (46.4)             |
| Cough                        | 37 (53.6)             |
| Shortness of breath          | 12 (17.4)             |
| Acute loss of smell or taste | 12 (17.4)             |
| Fatigue                      | 24 (34.8)             |
| Headache                     | 29 (42.0)             |
| Muscle aches                 | 20 (29.0)             |
| Nausea/Vomiting/Diarrhea     | 10 (14.7)             |
| General weakness             | 19 (27.5)             |
| Nasal congestion             | 22 (31.9)             |
| Sore throat                  | 29 (42.0)             |

**Table S3. Characteristics of the 3 participants with BTI who were hospitalized due to COVID-19**

| <b>ID</b> | <b>Age</b> | <b>Sex</b> | <b>Multimorbidity</b> | <b>CD4 count</b> |
|-----------|------------|------------|-----------------------|------------------|
| 102087    | 56         | F          | N                     | 1108             |
| 208002    | 65         | M          | Y                     | 343              |
| 401050    | 59         | M          | Y                     | 1090             |
